# Supplementary material
Source: PubMed Central journal article supplement (PMC6421409)
Supplement: pnas.1814497116.sapp.pdf [file pnas.1814497116.sapp.pdf]

## Supporting Information Appendix:

### **$\alpha$ -Difluoromethylornithine Reduces Gastric Carcinogenesis by Causing Mutations in *Helicobacter pylori* *cagY***

Johanna C. Sierra<sup>a,b</sup>, Giovanni Suarez<sup>a</sup>, M. Blanca Piazuelo<sup>a,b</sup>, Paula B. Luis<sup>c</sup>, Dara R. Baker<sup>a</sup>, Judith Romero-Gallo<sup>a</sup>, Daniel P. Barry<sup>a</sup>, Claus Schneider<sup>b,c</sup>, Douglas R. Morgan<sup>a,b</sup>, Richard M. Peek Jr.<sup>a,b,d</sup>, Alain P. Gobert<sup>a,b</sup> and Keith T. Wilson<sup>a,b,d,e,1</sup>.

<sup>a</sup>Division of Gastroenterology, Hepatology, and Nutrition, Department of Medicine, Vanderbilt University Medical Center, Nashville, TN 37232, USA; <sup>b</sup>Center for Mucosal Inflammation and Cancer, Vanderbilt University Medical Center, Nashville, TN 37232, USA; <sup>c</sup>Department of Pharmacology, Vanderbilt University Medical Center, Nashville, TN 37232, USA; <sup>d</sup>Department of Pathology, Microbiology and Immunology, Vanderbilt University School of Medicine, Nashville, TN 37232, USA; <sup>e</sup>Veterans Affairs Tennessee Valley Healthcare System, Nashville, TN 37232, USA

<sup>1</sup>To whom correspondence may be addressed. Keith T. Wilson. Vanderbilt University Medical Center, 2215B Garland Ave., 1030C MRB IV, Nashville, TN 37232-0252. Phone 615-343-5675. Email: [keith.wilson@vumc.org](mailto:keith.wilson@vumc.org)

#### **This PDF file includes:**

Figs. S1 to S9

Table S1 to S3

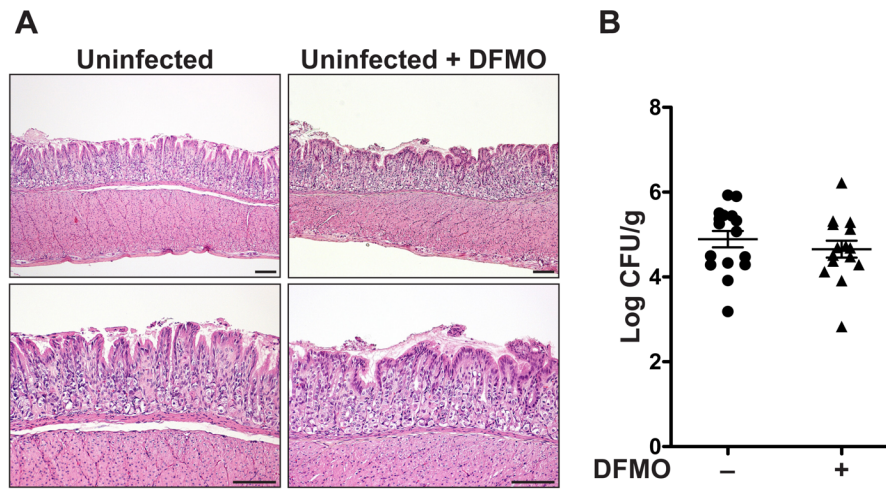

**Figure S1.** (A) H&E staining of gastric tissues from uninfected gerbils, showing normal gastric histology. 7 gerbils per group in control and DFMO-treated. Scale bars = 100  $\mu$ m. (B) Colonization density in gastric tissues of gerbils infected with *H. pylori* 7.13 for 12 weeks and treated or not with DFMO.











5301>GGGCGATAGTATTAAGATTCTCACAATGGACGATATTGATTTTAGTGGCGTGTATGATGTTAAAATTACCAACAAATCTGTGGTAGATGAAATTATCAAA>5400  
5301>GGGCGATAGTATTAAGATTCTCACAATGGACGATATTGATTTTAGTGGCGTGTATGATGTTAAAATTACCAACAAATCTGTGGTAGATGAAATTATCAAA>5400  
5301>GGGCGATAGTATTAAGATTCTCACAATGGACGATATTGATTTTAGTGGCGTGTATGATGTTAAAATTACCAACAAATCTGTGGTAGATGAAATTATCAAA>5400  
5301>GGGCGATAGTATTAAGATTCTCACAATGGACGATATTGATTTTAGTGGCGTGTATGATGTTAAAATTACCAACAAATCTGTGGTAGATGAAATTATCAAA>5400  
5301>GGGCGATAGTATTAAGATTCTCACAATGGACGATATTGATTTTAGTGGCGTGTATGATGTTAAAATTACCAACAAATCTGTGGTAGATGAAATTATCAAA>5400  
5301>GGGCGATAGTATTAAGATTCTCACAATGGACGATATTGATTTTAGTGGCGTGTATGATGTTAAAATTACCAACAAATCTGTGGTAGATGAAATTATCAAA>5400

5401>CAAAGCACTAAAACTTTGTCTAGAGAACATGAAGAAATCACCACAAGCCCCAAAGGTGGCAATTAA>5466  
5401>CAAAGCACTAAAACTTTGTCTAGAGAACATGAAGAAATCACCACAAGCCCCAAAGGTGGCAATTAA>5466  
5401>CAAAGCACTAAAACTTTGTCTAGAGAACATGAAGAAATCACCACAAGCCCCAAAGGTGGCAATTAA>5466  
5401>CAAAGCACTAAAACTTTGTCTAGAGAACATGAAGAAATCACCACAAGCCCCAAAGGTGGCAATTAA>5466  
5401>CAAAGCACTAAAACTTTGTCTAGAGAACATGAAGAAATCACCACAAGCCCCAAAGGTGGCAATTAA>5466  
5401>CAAAGCACTAAAACTTTGTCTAGAGAACATGAAGAAATCACCACAAGCCCCAAAGGTGGCAATTAA>5466



























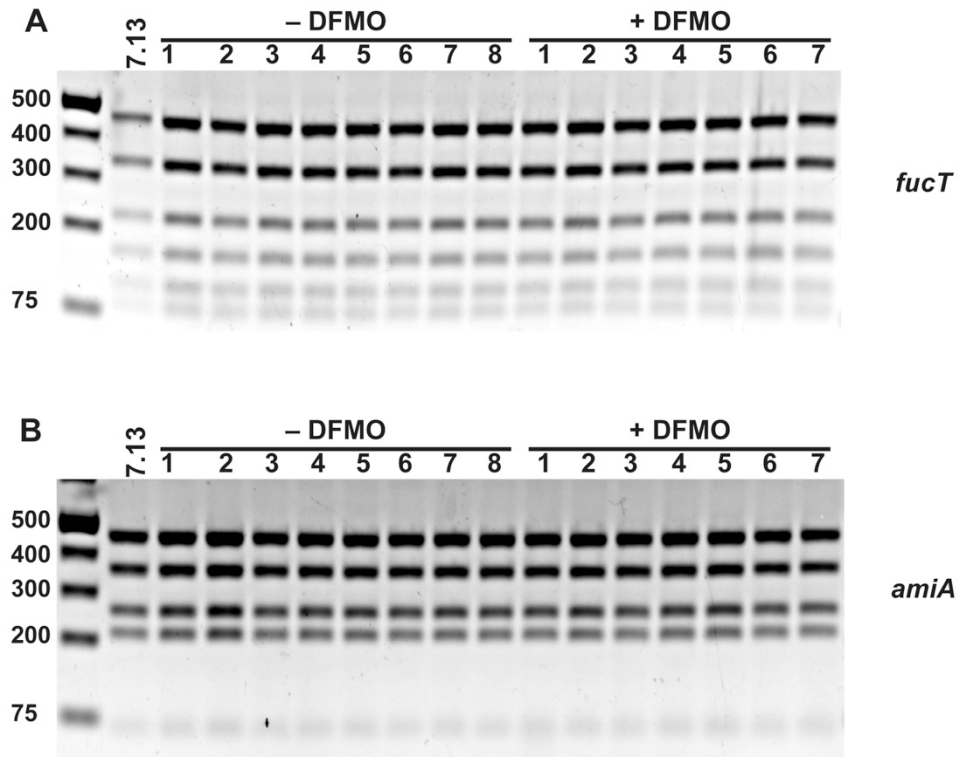

**Figure S3.** (A) Fucosyltransferase (*fucT*) and (B) N-acetylmuramoyl-L-alanine amidase (*amiA*) RFLP profiles of *H. pylori* gerbil output strains.

























1301>ACAAAAACCCGTTGAGAGCCTTTTATGAATGTATTAGTAATGGTGCCAACATGAAGAATGTTTGAAGCTTATCAAAGACAAAAAAGTTCAAGATCAGAT>1400  
1301>ACAAAAACCCGTTGAGAGCCTTTTATGAATGTATTAGTAATGGTGCCAACATGAAGAATGTTTGAAGCTTATCAAAGACAAAAAAGTTCAAGATCAGAT>1400  
1301>ACAAAAACCCGTTGAGAGCCTTTTATGAATGTATTAGTAATGGTGCCAACATGAAGAATGTTTGAAGCTTATCAAAGACAAAAAAGTTCAAGATCAGAT>1400  
1301>ACAAAAACCCGTTGAGAGCCTTTTATGAATGTATTAGTAATGGTGCCAACATGAAGAATGTTTGAAGCTTATCAAAGACAAAAAAGTTCAAGATCAGAT>1400  
  
1401>GAAAAAGACTCTAGAGGCTTATAATGACTGCATCAAAAATGCCAAAACGAAGAAGAAAGGATCAAGTGTTAGATTTAATCAAAGATGAAAACTGAAA>1500  
1401>GAAAAAGACTCTAGAGGCTTATAATGACTGCATCAAAAATGCCAAAACGAAGAAGAAAGGATCAAGTGTTAGATTTAATCAAAGATGAAAACTGAAA>1500  
1401>GAAAAAGACTCTAGAGGCTTATAATGACTGCATCAAAAATGCCAAAACGAAGAAGAAAGGATCAAGTGTTAGATTTAATCAAAGATGAAAACTGAAA>1500  
1401>GAAAAAGACTCTAGAGGCTTATAATGACTGCATCAAAAATGCCAAAACGAAGAAGAAAGGATCAAGTGTTAGATTTAATCAAAGATGAAAACTGAAA>1500  
  
1501>AAAAGCTTACTGAACCAACAAAAAGTTCAAGTGCGCTAGATTGTTTAAAAACGCTAAAACGATGAAGAACGGAAGAGTGCCTAAAACCTATAAATG>1600  
1501>AAAAGCTTACTGAACCAACAAAAAGTTCAAGTGCGCTAGATTGTTTAAAAACGCTAAAACGATGAAGAACGGAAGAGTGCCTAAAACCTATAAATG>1600  
1501>AAAAGCTTACTGAACCAACAAAAAGTTCAAGTGCGCTAGATTGTTTAAAAACGCTAAAACGATGAAGAACGGAAGAGTGCCTAAAACCTATAAATG>1600  
1501>AAAAGCTTACTGAACCAACAAAAAGTTCAAGTGCGC----->1536  
1501>AAAAGCTTACTGAACCAACAAAAAGTTCAAGTGCGC----->1536  
  
1601>ACCCTGAGATTAGAGAGAAATCCGTAAGGAATTAGAGCTTCAAAAAGAGCTTCAAGAGTATAAGGATTGTATCAAAAACGCCAAAACAGAGCTGAGAA>1700  
1601>ACCCTGAGATTAGAGAGAAATCCGTAAGGAATTAGAGCTTCAAAAAGAGCTTCAAGAGTATAAGGATTGTATCAAAAACGCCAAAACAGAGCTGAGAA>1700  
1601>ACCCTGAGATTAGAGAGAAATCCGTAAGGAATTAGAGCTTCAAAAAGAGCTTCAAGAGTATAAGGATTGTATCAAAAACGCCAAAACAGAGCTGAGAA>1700  
1536>----->1536  
1536>----->1536  
  
1701>AACGAATGCTTGAAGGCTTGTCTAAAGAAGCTATAGAAAGATTGAAACAGCAAGCGCTAGATTGTTTAAAAACGCTAAAACGATGAAGAACGAAAC>1800  
1701>AACGAATGCTTGAAGGCTTGTCTAAAGAAGCTATAGAAAGATTGAAACAGCAAGCGCTAGATTGTTTAAAAACGCTAAAACGATGAAGAACGAAAC>1800  
1701>AACGAATGCTTGAAGGCTTGTCTAAAGAAGCTATAGAAAGATTGAAACAGCAAGCGCTAGATTGTTTAAAAACGCTAAAACGATGAAGAACGAAAC>1800  
1536>----->1536  
1536>----->1536  
  
1801>GAGTGCTTGA AAAATATTCCCAAGACTTGCAAAAAGAAGCTACTAGCTGATATGAGCGTCAAGGCTTACAAGGATTGCGTATCAAAAAGCTAGGAATGAAA>1900  
1801>GAGTGCTTGA AAAATATTCCCAAGACTTGCAAAAAGAAGCTACTAGCTGATATGAGCGTCAAGGCTTACAAGGATTGCGTATCAAAAAGCTAGGAATGAAA>1900  
1801>GAGTGCTTGA AAAATATTCCCAAGACTTGCAAAAAGAAGCTACTAGCTGATATGAGCGTCAAGGCTTACAAGGATTGCGTATCAAAAAGCTAGGAATGAAA>1900  
1536>----->1536  
1536>----->1536  
  
1901>AAGAGAAACAAGAATGCGAGAAATTAAGGCTGAAAGCGAGGAAAAAGTTAGAACACAGGTTCTAGATTGTTTAAAAACGCTAAAACGATGAAGA>2000  
1901>AAGAGAAAC----->1909  
1901>AAGAGAAAC----->1909  
1537>-----CTAGATTGTTTAAAAACGCTAAAACGATGAAGA>1571  
1537>-----CTAGATTGTTTAAAAACGCTAAAACGATGAAGA>1571  
  
2001>ACGAAAAAATGTTTGAAGATCTCCCTAAAGACTTACAAAGCGATATTTAGCTAAAGAGAGCGTTAAAGCTTATAAAGATTGCGTATCTCAAGCCAAA>2100  
1909>----->1909  
1909>----->1909  
1572>ACGAAAAAATGTTTGAAGATCTCCCTAAAGACTTACAAAGCGATATTTAGCTAAAGAGAGCGTTAAAGCTTATAAAGATTGCGTATCTCAAGCCAAA>1671  
1572>ACGAAAAAATGTTTGAAGATCTCCCTAAAGACTTACAAAGCGATATTTAGCTAAAGAGAGCGTTAAAGCTTATAAAGATTGCGTATCTCAAGCCAAA>1671  
  
2101>AACGAAGCTGAGAAAAAGAATGCGAGAAATTAAGGCTGAAAGCGAAAAAAGTTTGAAGAAGAAGCCAAAGAGAGCGTTAAAGCTTATTTGGATT>2200  
1909>----->1909  
1909>----->1909  
1672>AACGAAGCTGAGAAAAAGAATGCGAGAAATTAAGGCTGAAAGCGAAAAAAGTTTGAAGAAGAAGCCAAAGAGAGCGTTAAAGCTTATTTGGATT>1771  
1672>AACGAAGCTGAGAAAAAGAATGCGAGAAATTAAGGCTGAAAGCGAAAAAAGTTTGAAGAAGAAGCCAAAGAGAGCGTTAAAGCTTATTTGGATT>1771  
  
2201>GCGTATCTCAAGCCAAAAGCTGAAGCCGAGAAAAAGAATGCGAGAAATTAAGGCTGAAAGCGAAAAAAGTTTGAAGAAGAAGCCAAAGAGAGCGT>2300  
1910>-----AAGAAATGCGAGAAATTAAGGCTGAAAGCGAAAAAAGTTTGAAGAAGAAGCCAAAGAGAGCGT>1976  
1910>-----AAGAAATGCGAGAAATTAAGGCTGAAAGCGAAAAAAGTTTGAAGAAGAAGCCAAAGAGAGCGT>1976  
1772>GCGTATCTCAAGCCAAAAGCTGAAGCCGAGAAAAAGAATGCGAGAAATTAAGGCTGAAAGCGAAAAAAGTTTGAAGAAGAAGCCAAAGAGAGCGT>1871  
1772>GCGTATCTCAAGCCAAAAGCTGAAGCCGAGAAAAAGAATGCGAGAAATTAAGGCTGAAAGCGAAAAAAGTTTGAAGAAGAAGCCAAAGAGAGCGT>1871  
  
2301>TAAGGCTTATTTGGATTGCGTATCTCAAGCCAAAAGCTGAAGCCGAGAAAAAGAGTGTGAGAAATTAAGGCTGAAAGCGAAAAAAGTTAGAGAA>2400  
1977>TAAGGCTTATTTGGATTGCGTATCTCAAGCCAAAAGCTGAAGCCGAGAAAAAGAGTGTGAGAAATTAAGGCTGAAAGCGAAAAAAGTTAGAGAA>2076  
1977>TAAGGCTTATTTGGATTGCGTATCTCAAGCCAAAAGCTGAAGCCGAGAAAAAGAGTGTGAGAAATTAAGGCTGAAAGCGAAAAAAGTTAGAGAA>2076  
1872>TAAGGCTTATTTGGATTGCGTATCTCAAGCCAAAAGCTGAAGCCGAGAAAAAGAGTGTGAGAAATTAAGGCTGAAAGCGAAAAAAGTTAGAGAA>1971  
1872>TAAGGCTTATTTGGATTGCGTATCTCAAGCCAAAAGCTGAAGCCGAGAAAAAGAGTGTGAGAAATTAAGGCTGAAAGCGAAAAAAGTTAGAGAA>1971  
  
2401>GCTAAAAAAGCGTTAAAGCTTATTTGGACTGCGTATCTCAAGCCAAAAGCTGAAGAAGGATGAGAAAAAGAATGCGAGAAATTAAGGCTGAAAGCGAGAA>2500  
2077>GCTAAAAAAGCGTTAAAGCTTATTTGGACTGCGTATCTCAAGCCAAAAGCTGAAGAAGGATGAGAAAAAGAATGCGAGAAATTAAGGCTGAAAGCGAGAA>2176  
2077>GCTAAAAAAGCGTTAAAGCTTATTTGGACTGCGTATCTCAAGCCAAAAGCTGAAGAAGGATGAGAAAAAGAATGCGAGAAATTAAGGCTGAAAGCGAGAA>2176  
1972>GCTAAAAAAGCGTTAAAGCTTATTTGGACTGCGTATCTCAAGCCAAAAGCTGAAGAAGGATGAGAAAAAGAATGCGAGAAATTAAGGCTGAAAGCGAGAA>2071  
1972>GCTAAAAAAGCGTTAAAGCTTATTTGGACTGCGTATCTCAAGCCAAAAGCTGAAGAAGGATGAGAAAAAGAATGCGAGAAATTAAGGCTGAAAGCGAGAA>2071  
  
2501>AAGCTTTTGAAGCAACAAGCGTTAGATTGTTTAAAAATGCTAAAACCGATGAAGAAGGATGTTTGAAGATCTCCCTAAAGACTTGCAGAAAA>2600  
2177>AAGCTTTTGAAGCAACAAGCGTTAGATTGTTTAAAAATGCTAAAACCGATGAAGAAGGATGTTTGAAGATCTCCCTAAAGACTTGCAGAAAA>2276  
2177>AAGCTTTTGAAGCAACAAGCGTTAGATTGTTTAAAAATGCTAAAACCGATGAAGAAGGATGTTTGAAGATCTCCCTAAAGACTTGCAGAAAA>2276  
2072>AAGCTTTTGAAGCAACAAGCGTTAGATTGTTTAAAAATGCTAAAACCGATGAAGAAGGATGTTTGAAGATCTCCCTAAAGACTTGCAGAAAA>2171  
2072>AAGCTTTTGAAGCAACAAGCGTTAGATTGTTTAAAAATGCTAAAACCGATGAAGAAGGATGTTTGAAGATCTCCCTAAAGACTTGCAGAAAA>2171  
  
2601>GGTTTTAGCCAAAGAGAGCGTTAAGGCTTATTTGGATTGCGTATCTCAAGCCAAAAGCTGAGAAAAAGAATGCGAGAAATTAAGGCTGAA>2700  
2277>GGTTTTAGCCAAAGAGAGCGTTAAGGCTTATTTGGATTGCGTATCTCAAGCCAAAAGCTGAGAAAAAGAATGCGAGAAATTAAGGCTGAA>2376  
2277>GGTTTTAGCCAAAGAGAGCGTTAAGGCTTATTTGGATTGCGTATCTCAAGCCAAAAGCTGAGAAAAAGAATGCGAGAAATTAAGGCTGAA>2376  
2172>GGTTTTAGCCAAAGAGAGCGTTAAG----->2196  
2172>GGTTTTAGCCAAAGAGAGCGTTAAG----->2196  
  
2701>GCGAGAAAACTTTAGAAGAGGCTAAAGAGAGCATTAAAGCTTATAAAGACTGCGTATCAAAAAGCTAGGAATGAAAAAGAGAAAAAGAATGCGAGAAAT>2800  
2377>GCGAGAAAACTTTAGAAGAGGCTAAAGAGAGCATTAAAGCTTATAAAGACTGCGTATCAAAAAGCTAGGAATGAAAAAGAGAAAAAGAATGCGAGAAAT>2476  
2377>GCGAGAAAACTTTAGAAGAGGCTAAAGAGAGCATTAAAGCTTATAAAGACTGCGTATCAAAAAGCTAGGAATGAAAAAGAGAAAAAGAATGCGAGAAAT>2476



2196>----->2196  
2196>----->2196

2801>TGCTCACCCCTGAAGCGAAAAAAGCTTTTGAAGAAGAAGCCAAAGAGAGCGTTAAGGCTTATTTGGATTGCGTATCTCAAGCCAAAAGCTGAAGCCGAGAA>2900  
2477>TGCTCACCCCTGAAGCGAAAAAAGCTTTTGAAGAAGAAGCCAAAGAGAGCGTTAAGGCTTATTTGGATTGCGTATCTCAAGCCAAAAGCTGAAGCCGAGAA>2576  
2477>TGCTCACCCCTGAAGCGAAAAAAGCTTTTGAAGAAGAAGCCAAAGAGAGCGTTAAGGCTTATTTGGATTGCGTATCTCAAGCCAAAAGCTGAAGCCGAGAA>2576  
2196>----->2196  
2196>----->2196

2901>AAAAGAGTGTGAGAAATTAACACCCCTGAAGCGAAAAAAGCTTTTGAAGAAGCTAAAGAGAGCCTTAAAGCTTATAAAGACTGCGTATCAAGAGCTAGG>3000  
2577>AAAAGAGTGTGAGAAATTAACACCCCTGAAGCGAAAAAAGCTTTTGAAGAAGCTAAAGAGAGCCTTAAAGCTTATAAAGACTGCGTATCAAGAGCTAGG>2676  
2577>AAAAGAGTGTGAGAAATTAACACCCCTGAAGCGAAAAAAGCTTTTGAAGAAGCTAAAGAGAGCCTTAAAGCTTATAAAGACTGCGTATCAAGAGCTAGG>2676  
2196>----->2196  
2196>----->2196

3001>AATGAAAAAGAGAAAAAGAAATGCGAGAAATTGCTCACCCCTGAAGCGAAAAAAGCTTTTGAACAACAAGCGCTAGATTGTTTAAAAACGCTAAAACCG>3100  
2677>AATGAAAAAGAGAAAAAGAAATGCGAGAAATTGCTCACCCCTGAAGCGAAAAAAGCTTTTGAACAACAAGCGCTAGATTGTTTAAAAACGCTAAAACCG>2776  
2677>AATGAAAAAGAGAAAAAGAAATGCGAGAAATTGCTCACCCCTGAAGCGAAAAAAGCTTTTGAACAACAAGCGCTAGATTGTTTAAAAACGCTAAAACCG>2776  
2196>----->2196  
2196>----->2196

3101>AAGCTGATAAAAAAGGTGTGTCAAAGATCTCCCTAAAGACTGCAGAAAAAGGTTTTAGCTAAAGAGAGCGTTAAAGCTTATAAAGACTGCGTATCAAG>3200  
2777>AAGCTGATAAAAAAGGTGTGTCAAAGATCTCCCTAAAGACTGCAGAAAAAGGTTTTAGCTAAAGAGAGCGTTAAAGCTTATAAAGACTGCGTATCAAG>2876  
2777>AAGCTGATAAAAAAGGTGTGTCAAAGATCTCCCTAAAGACTGCAGAAAAAGGTTTTAGCTAAAGAGAGCGTTAAAGCTTATAAAGACTGCGTATCAAG>2876  
2196>----->2196  
2196>----->2196

3201>AGCTAGGAATGAAAAAGAGAAAAAGGAATGCGAGAAATTAACACCCCTGAAGCGAAAAAAGCTTTTGAAGAAGCTAAAGAGAGCTTAAAGCTTATAAA>3300  
2877>AGCTAGGAATGAAAAAGAGAAAAAGGAATGCGAGAAATTAACACCCCTGAAGCGAAAAAAGCTTTTGAAGAAGCTAAAGAGAGCTTAAAGCTTATAAA>2976  
2877>AGCTAGGAATGAAAAAGAGAAAAAGGAATGCGAGAAATTAACACCCCTGAAGCGAAAAAAGCTTTTGAAGAAGCTAAAGAGAGCTTAAAGCTTATAAA>2976  
2196>----->2196  
2196>----->2196

3301>GACTGCCTCTCTCAAGCTAGAAATGAAGAAGAAAGGAGAGCTTGCAGAAAAGCTACTCAGCCTGAAGCGAGGAAACTCTTAGAGCAAGAAGTTAAGAAGA>3400  
2977>GACTGCCTCTCTCAAGCTAGAAATGAAGAAGAAAGGAGAGCTTGCAGAAAAGCTACTCAGCCTGAAGCGAGGAAACTCTTAGAGCAAGAAGTTAAGAAGA>3076  
2977>GACTGCCTCTCTCAAGCTAGAAATGAAGAAGAAAGGAGAGCTTGCAGAAAAGCTACTCAGCCTGAAGCGAGGAAACTCTTAGAGCAAGAAGTTAAGAAGA>3076  
2196>----->2196  
2196>----->2196

3401>GCGTTAAGGCTTATTTGGATTGCGTATCTCAAGCCAAAAGCTGAAGCTGAGAAAAAAGAAATGCGAGAAATTAACACCCCTGAAGCGAGAAAGTTCTTAGC>3500  
3077>GCGTTAAGGCTTATTTGGATTGCGTATCTCAAGCCAAAAGCTGAAGCTGAGAAAAAAGAAATGCGAGAAATTAACACCCCTGAAGCGAGAAAGTTCTTAGC>3176  
3077>GCGTTAAGGCTTATTTGGATTGCGTATCTCAAGCCAAAAGCTGAAGCTGAGAAAAAAGAAATGCGAGAAATTAACACCCCTGAAGCGAGAAAGTTCTTAGC>3176  
2196>----->2196  
2196>----->2196

3501>GAAGCAAGTGCTAAATGTTTGGAAAAAGCTGAAATGAAGAAGAAAGAAAGCATGTCTTAAAAATCTCCCTAAAGACTTACAGGAAAAATGTTTTAGCT>3600  
3177>GAAGCAAGTGCTAAATGTTTGGAAAAAGCTGAAATGAAGAAGAAAGAAAGCATGTCTTAAAAATCTCCCTAAAGACTTACAGGAAAAATGTTTTAGCT>3276  
3177>GAAGCAAGTGCTAAATGTTTGGAAAAAGCTGAAATGAAGAAGAAAGAAAGCATGTCTTAAAAATCTCCCTAAAGACTTACAGGAAAAATGTTTTAGCT>3276  
2196>----->2196  
2196>----->2196

3601>AAAGAGAGCTTAAAGCTTATAAAGACTGCCTCTCTCAAGCTAGAAATGAAGAAGAAAGGAGAGCTTGCAGAAAATTAACACCCCTGAAGCGAGAAAAAC>3700  
3277>AAAGAGAGCTTAAAGCTTATAAAGACTGCCTCTCTCAAGCTAGAAATGAAGAAGAAAGGAGAGCTTGCAGAAAATTAACACCCCTGAAGCGAGAAAAAC>3376  
3277>AAAGAGAGCTTAAAGCTTATAAAGACTGCCTCTCTCAAGCTAGAAATGAAGAAGAAAGGAGAGCTTGCAGAAAATTAACACCCCTGAAGCGAGAAAAAC>3376  
2197>-----GCTTATAAAGACTGCCTCTCTCAAGCTAGAAATGAAGAAGAAAGGAGAGCTTGCAGAAAATTAACACCCCTGAAGCGAGAAAAAC>2281  
2197>-----GCTTATAAAGACTGCCTCTCTCAAGCTAGAAATGAAGAAGAAAGGAGAGCTTGCAGAAAATTAACACCCCTGAAGCGAGAAAAAC>2281

3701>TCTTAGAGCAAGAAGTTAAGAAGAGCGTTAAGGCTTATTTGGACTGCGTATCAAGAGCTAGGAATGAAAAAGAGAAAAAAGAAATGCGAGAAATGCTCAC>3800  
3377>TCTTAGAGCAAGAAGTTAAGAAGAGCGTTAAGGCTTATTTGGACTGCGTATCAAGAGCTAGGAATGAAAAAGAGAAAAAAGAAATGCGAGAAATGCTCAC>3476  
3377>TCTTAGAGCAAGAAGTTAAGAAGAGCGTTAAGGCTTATTTGGACTGCGTATCAAGAGCTAGGAATGAAAAAGAGAAAAAAGAAATGCGAGAAATGCTCAC>3476  
2282>TCTTAGAGCAAGAAGTTAAGAAGAGCGTTAAGGCTTATTTGGACTGCGTATCAAGAGCTAGGAATGAAAAAGAGAAAAAAGAAATGCGAGAAATGCTCAC>2381  
2282>TCTTAGAGCAAGAAGTTAAGAAGAGCGTTAAGGCTTATTTGGACTGCGTATCAAGAGCTAGGAATGAAAAAGAGAAAAAAGAAATGCGAGAAATGCTCAC>2381

3801>CCCTGAAGCGAGGAAATTTTTAGCGAAAGAAGCTCCAAACAAAAGATAAAGCGATCAAGATTGCTTGAAAAACGCCGATCCTAACGCACAGAGCGGCTATC>3900  
3477>CCCTGAAGCGAGGAAATTTTTAGCGAAAGAAGCTCCAAACAAAAGATAAAGCGATCAAGATTGCTTGAAAAACGCCGATCCTAACGCACAGAGCGGCTATC>3576  
3477>CCCTGAAGCGAGGAAATTTTTAGCGAAAGAAGCTCCAAACAAAAGATAAAGCGATCAAGATTGCTTGAAAAACGCCGATCCTAACGCACAGAGCGGCTATC>3576  
2382>CCCTGAAGCGAGGAAATTTTTAGCGAAAGAAGCTCCAAACAAAAGATAAAGCGATCAAGATTGCTTGAAAAACGCCGATCCTAACGCACAGAGCGGCTATC>2481  
2382>CCCTGAAGCGAGGAAATTTTTAGCGAAAGAAGCTCCAAACAAAAGATAAAGCGATCAAGATTGCTTGAAAAACGCCGATCCTAACGCACAGAGCGGCTATC>2481

3901>ATGAAGTGTGGATGGTTTGGATGAGCGATGAAGAGAAGCTCAAAATACCTGCAAGAAGCTAGAGAAAAGGCTGTCTTGGATTGTTTAAAAACGGCTAGGACCG>4000  
3577>ATGAAGTGTGGATGGTTTGGATGAGCGATGAAGAGAAGCTCAAAATACCTGCAAGAAGCTAGAGAAAAGGCTGTCTTGGATTGTTTAAAAACGGCTAGGACCG>3676  
3577>ATGAAGTGTGGATGGTTTGGATGAGCGATGAAGAGAAGCTCAAAATACCTGCAAGAAGCTAGAGAAAAGGCTGTCTTGGATTGTTTAAAAACGGCTAGGACCG>3676  
2482>ATGAAGTGTGGATGGTTTGGATGAGCGATGAAGAGAAGCTCAAAATACCTGCAAGAAGCTAGAGAAAAGGCTGTCTTGGATTGTTTAAAAACGGCTAGGACCG>2581  
2482>ATGAAGTGTGGATGGTTTGGATGAGCGATGAAGAGAAGCTCAAAATACCTGCAAGAAGCTAGAGAAAAGGCTGTCTTGGATTGTTTAAAAACGGCTAGGACCG>2581

4001>ATGAAGAAAAAGGAAATGCCAAAACCTTTATAGCGATTTGATCCAAGAAATCCAAAATAAAAGGACACAAAAGCAAACAAAATCAATTGAGTAAAACAGA>4100  
3677>ATGAAGAAAAAGGAAATGCCAAAACCTTTATAGCGATTTGATCCAAGAAATCCAAAATAAAAGGACACAAAAGCAAACAAAATCAATTGAGTAAAACAGA>3776  
3677>ATGAAGAAAAAGGAAATGCCAAAACCTTTATAGCGATTTGATCCAAGAAATCCAAAATAAAAGGACACAAAAGCAAACAAAATCAATTGAGTAAAACAGA>3776  
2582>ATGAAGAAAAAGGAAATGCCAAAACCTTTATAGCGATTTGATCCAAGAAATCCAAAATAAAAGGACACAAAAGCAAACAAAATCAATTGAGTAAAACAGA>2681  
2582>ATGAAGAAAAAGGAAATGCCAAAACCTTTATAGCGATTTGATCCAAGAAATCCAAAATAAAAGGACACAAAAGCAAACAAAATCAATTGAGTAAAACAGA>2681

4101>AAGATTGCATCAAGCAAGCGAGTGCTTGGATAAAGTATGACCCCTACTGATCAACAAGCCATAGAGCAATGTTTAGAGGGCTTGAAGCGATAGTAAAAGG>4200  
3777>AAGATTGCATCAAGCAAGCGAGTGCTTGGATAAAGTATGACCCCTACTGATCAACAAGCCATAGAGCAATGTTTAGAGGGCTTGAAGCGATAGTAAAAGG>3876  
3777>AAGATTGCATCAAGCAAGCGAGTGCTTGGATAAAGTATGACCCCTACTGATCAACAAGCCATAGAGCAATGTTTAGAGGGCTTGAAGCGATAGTAAAAGG>3876  
2682>AAGATTGCATCAAGCAAGCGAGTGCTTGGATAAAGTATGACCCCTACTGATCAACAAGCCATAGAGCAATGTTTAGAGGGCTTGAAGCGATAGTAAAAGG>2781  
2682>AAGATTGCATCAAGCAAGCGAGTGCTTGGATAAAGTATGACCCCTACTGATCAACAAGCCATAGAGCAATGTTTAGAGGGCTTGAAGCGATAGTAAAAGG>2781

4201>GCGCTAATCTAGGAATTAACGACAAGCTGATGAAGTGGATCGGATTTATAGCGATCTAAGAAACCGCAAAACCTTTGATAACATGGCGGCTAAAGGTT>4300  
3877>GCGCTAATCTAGGAATTAACGACAAGCTGATGAAGTGGATCGGATTTATAGCGATCTAAGAAACCGCAAAACCTTTGATAACATGGCGGCTAAAGGTT>3976  
3877>GCGCTAATCTAGGAATTAACGACAAGCTGATGAAGTGGATCGGATTTATAGCGATCTAAGAAACCGCAAAACCTTTGATAACATGGCGGCTAAAGGTT>3976  
2782>GCGCTAATCTAGGAATTAACGACAAGCTGATGAAGTGGATCGGATTTATAGCGATCTAAGAAACCGCAAAACCTTTGATAACATGGCGGCTAAAGGTT>2881  
2782>GCGCTAATCTAGGAATTAACGACAAGCTGATGAAGTGGATCGGATTTATAGCGATCTAAGAAACCGCAAAACCTTTGATAACATGGCGGCTAAAGGTT>2881

4301>ATCCGTTGTTGCCAATGGATTTCAAAAATGGCGGCGATATTGCCACTATTAACGCCACTAATGTTGATGCGGACAAAATAGCTAGCGATAATCCTATTTA>4400  
3977>ATCCGTTGTTGCCAATGGATTTCAAAAATGGCGGCGATATTGCCACTATTAACGCCACTAATGTTGATGCGGACAAAATAGCTAGCGATAATCCTATTTA>4076  
3977>ATCCGTTGTTGCCAATGGATTTCAAAAATGGCGGCGATATTGCCACTATTAACGCCACTAATGTTGATGCGGACAAAATAGCTAGCGATAATCCTATTTA>4076  
2882>ATCCGTTGTTGCCAATGGATTTCAAAAATGGCGGCGATATTGCCACTATTAACGCCACTAATGTTGATGCGGACAAAATAGCTAGCGATAATCCTATTTA>2981  
2882>ATCCGTTGTTGCCAATGGATTTCAAAAATGGCGGCGATATTGCCACTATTAACGCCACTAATGTTGATGCGGACAAAATAGCTAGCGATAATCCTATTTA>2981

4401>TGCTTCCATAGAGCCCGACATTACCAAACAATACGAAACAGAAAAACCATTAAAGGATAAGAATTTAGAAGCTAAATAGCTAAGGCTTTAGGTGGCAAT>4500  
4077>TGCTTCCATAGAGCCCGACATTACCAAACAATACGAAACAGAAAAACCATTAAAGGATAAGAATTTAGAAGCTAAATAGCTAAGGCTTTAGGTGGCAAT>4176  
4077>TGCTTCCATAGAGCCCGACATTACCAAACAATACGAAACAGAAAAACCATTAAAGGATAAGAATTTAGAAGCTAAATAGCTAAGGCTTTAGGTGGCAAT>4176  
2982>TGCTTCCATAGAGCCCGACATTACCAAACAATACGAAACAGAAAAACCATTAAAGGATAAGAATTTAGAAGCTAAATAGCTAAGGCTTTAGGTGGCAAT>3081  
2982>TGCTTCCATAGAGCCCGACATTACCAAACAATACGAAACAGAAAAACCATTAAAGGATAAGAATTTAGAAGCTAAATAGCTAAGGCTTTAGGTGGCAAT>3081

4501>AAAAAGATGACGATAAAGAAAAAGTAAAAATCCACAGCAGAAGCTAAAGTAGAAAGCAATAAGATAGACAAAGATGTCGCAGAACTGCTAAGAATA>4600  
4177>AAAAAGATGACGATAAAGAAAAAGTAAAAATCCACAGCAGAAGCTAAAGTAGAAAGCAATAAGATAGACAAAGATGTCGCAGAACTGCTAAGAATA>4276  
4177>AAAAAGATGACGATAAAGAAAAAGTAAAAATCCACAGCAGAAGCTAAAGTAGAAAGCAATAAGATAGACAAAGATGTCGCAGAACTGCTAAGAATA>4276  
3082>AAAAAGATGACGATAAAGAAAAAGTAAAAATCCACAGCAGAAGCTAAAGTAGAAAGCAATAAGATAGACAAAGATGTCGCAGAACTGCTAAGAATA>3181  
3082>AAAAAGATGACGATAAAGAAAAAGTAAAAATCCACAGCAGAAGCTAAAGTAGAAAGCAATAAGATAGACAAAGATGTCGCAGAACTGCTAAGAATA>3181

4601>TCAGTGAAATCGCTCTTAAGAACAATAAGAAAAAGTGGGAATTTGTAGATGAAAAATGGTAATCCCATTGATGACAAAAAGAAAGCAGAAAAACAAGA>4700  
4277>TCAGTGAAATCGCTCTTAAGAACAATAAGAAAAAGTGGGAATTTGTAGATGAAAAATGGTAATCCCATTGATGACAAAAAGAAAGCAGAAAAACAAGA>4376  
4277>TCAGTGAAATCGCTCTTAAGAACAATAAGAAAAAGTGGGAATTTGTAGATGAAAAATGGTAATCCCATTGATGACAAAAAGAAAGCAGAAAAACAAGA>4376  
3182>TCAGTGAAATCGCTCTTAAGAACAATAAGAAAAAGTGGGAATTTGTAGATGAAAAATGGTAATCCCATTGATGACAAAAAGAAAGCAGAAAAACAAGA>3281  
3182>TCAGTGAAATCGCTCTTAAGAACAATAAGAAAAAGTGGGAATTTGTAGATGAAAAATGGTAATCCCATTGATGACAAAAAGAAAGCAGAAAAACAAGA>3281

4701>TGAAACAAGCCCTGTCAAACAGGCCCTTTATAGGCAAGAGTATCCACATTTGTTTTAGCGCAATACACCCCCATTGAAATCACTCTGACTTCTAAAGTA>4800  
4377>TGAAACAAGCCCTGTCAAACAGGCCCTTTATAGGCAAGAGTATCCACATTTGTTTTAGCGCAATACACCCCCATTGAAATCACTCTGACTTCTAAAGTA>4476  
4377>TGAAACAAGCCCTGTCAAACAGGCCCTTTATAGGCAAGAGTATCCACATTTGTTTTAGCGCAATACACCCCCATTGAAATCACTCTGACTTCTAAAGTA>4476  
3282>TGAAACAAGCCCTGTCAAACAGGCCCTTTATAGGCAAGAGTATCCACATTTGTTTTAGCGCAATACACCCCCATTGAAATCACTCTGACTTCTAAAGTA>3381  
3282>TGAAACAAGCCCTGTCAAACAGGCCCTTTATAGGCAAGAGTATCCACATTTGTTTTAGCGCAATACACCCCCATTGAAATCACTCTGACTTCTAAAGTA>3381

4801>GATGCCACTCTCACAGGTATAGTGAGTGGGGTTGTAGCCAAAGATGTATGGAACATGAACGGCCTATGATCTTACTAGATAAAGGCACTAAGGTGTATG>4900  
4477>GATGCCACTCTCACAGGTATAGTGAGTGGGGTTGTAGCCAAAGATGTATGGAACATGAACGGCCTATGATCTTACTAGATAAAGGCACTAAGGTGTATG>4576  
4477>GATGCCACTCTCACAGGTATAGTGAGTGGGGTTGTAGCCAAAGATGTATGGAACATGAACGGCCTATGATCTTACTAGATAAAGGCACTAAGGTGTATG>4576  
3382>GATGCCACTCTCACAGGTATAGTGAGTGGGGTTGTAGCCAAAGATGTATGGAACATGAACGGCCTATGATCTTACTAGATAAAGGCACTAAGGTGTATG>3481  
3382>GATGCCACTCTCACAGGTATAGTGAGTGGGGTTGTAGCCAAAGATGTATGGAACATGAACGGCCTATGATCTTACTAGATAAAGGCACTAAGGTGTATG>3481

4901>GGAATTATCAAAGCGTGAAAGGTGGCACACCTATTATGACACGCTTAATGATAGTCTTTACTAAAGCCATTACGCCTGATGGTGTGATAATACCTCTAGC>5000  
4577>GGAATTATCAAAGCGTGAAAGGTGGCACACCTATTATGACACGCTTAATGATAGTCTTTACTAAAGCCATTACGCCTGATGGTGTGATAATACCTCTAGC>4676  
4577>GGAATTATCAAAGCGTGAAAGGTGGCACACCTATTATGACACGCTTAATGATAGTCTTTACTAAAGCCATTACGCCTGATGGTGTGATAATACCTCTAGC>4676  
3482>GGAATTATCAAAGCGTGAAAGGTGGCACACCTATTATGACACGCTTAATGATAGTCTTTACTAAAGCCATTACGCCTGATGGTGTGATAATACCTCTAGC>3581  
3482>GGAATTATCAAAGCGTGAAAGGTGGCACACCTATTATGACACGCTTAATGATAGTCTTTACTAAAGCCATTACGCCTGATGGTGTGATAATACCTCTAGC>3581

5001>AAACGCTCAAGCAGCAGGCATGTTGGGTGAAGCAGGGGTAGATGGCTATGTGAATAATCACTTTATGAAGCGCATAGGCTTTGCTGTGATGCAAGCGTG>5100  
4677>AAACGCTCAAGCAGCAGGCATGTTGGGTGAAGCAGGGGTAGATGGCTATGTGAATAATCACTTTATGAAGCGCATAGGCTTTGCTGTGATGCAAGCGTG>4776  
4677>AAACGCTCAAGCAGCAGGCATGTTGGGTGAAGCAGGGGTAGATGGCTATGTGAATAATCACTTTATGAAGCGCATAGGCTTTGCTGTGATGCAAGCGTG>4776  
3582>AAACGCTCAAGCAGCAGGCATGTTGGGTGAAGCAGGGGTAGATGGCTATGTGAATAATCACTTTATGAAGCGCATAGGCTTTGCTGTGATGCAAGCGTG>3681  
3582>AAACGCTCAAGCAGCAGGCATGTTGGGTGAAGCAGGGGTAGATGGCTATGTGAATAATCACTTTATGAAGCGCATAGGCTTTGCTGTGATGCAAGCGTG>3681

5101>GTTAATAGCTTCTTGCAAACCTGCGCCTATCATAGCTCTAGATAAACTCATAGGCTTTGGCAAAGGTAGAAGTGAAGGACACCTGAATTTAATTACGCTT>5200  
4777>GTTAATAGCTTCTTGCAAACCTGCGCCTATCATAGCTCTAGATAAACTCATAGGCTTTGGCAAAGGTAGAAGTGAAGGACACCTGAATTTAATTACGCTT>4876  
4777>GTTAATAGCTTCTTGCAAACCTGCGCCTATCATAGCTCTAGATAAACTCATAGGCTTTGGCAAAGGTAGAAGTGAAGGACACCTGAATTTAATTACGCTT>4876  
3682>GTTAATAGCTTCTTGCAAACCTGCGCCTATCATAGCTCTAGATAAACTCATAGGCTTTGGCAAAGGTAGAAGTGAAGGACACCTGAATTTAATTACGCTT>3781  
3682>GTTAATAGCTTCTTGCAAACCTGCGCCTATCATAGCTCTAGATAAACTCATAGGCTTTGGCAAAGGTAGAAGTGAAGGACACCTGAATTTAATTACGCTT>3781

5201>TGGGTCAAGCTATCAATGGTAGTATGCAAAGTTCAGCCAGATGTCTAATCAAATTTAGGGCAACTGATGAATATCCCCCAAGTTTTTACAAAAATGA>5300  
4877>TGGGTCAAGCTATCAATGGTAGTATGCAAAGTTCAGCCAGATGTCTAATCAAATTTAGGGCAACTGATGAATATCCCCCAAGTTTTTACAAAAATGA>4976  
4877>TGGGTCAAGCTATCAATGGTAGTATGCAAAGTTCAGCCAGATGTCTAATCAAATTTAGGGCAACTGATGAATATCCCCCAAGTTTTTACAAAAATGA>4976  
3782>TGGGTCAAGCTATCAATGGTAGTATGCAAAGTTCAGCCAGATGTCTAATCAAATTTAGGGCAACTGATGAATATCCCCCAAGTTTTTACAAAAATGA>3881  
3782>TGGGTCAAGCTATCAATGGTAGTATGCAAAGTTCAGCCAGATGTCTAATCAAATTTAGGGCAACTGATGAATATCCCCCAAGTTTTTACAAAAATGA>3881

5301>GGGCGATAGTATTAAGATTCTACAATGGACGATATTGATTTTGTAGTGGCGTGTATGATGTTAAAAATTACCAACAAATCTGTGGTAGATGAAATTTACAAA>5400  
4977>GGGCGATAGTATTAAGATTCTACAATGGACGATATTGATTTTGTAGTGGCGTGTATGATGTTAAAAATTACCAACAAATCTGTGGTAGATGAAATTTACAAA>5076  
4977>GGGCGATAGTATTAAGATTCTACAATGGACGATATTGATTTTGTAGTGGCGTGTATGATGTTAAAAATTACCAACAAATCTGTGGTAGATGAAATTTACAAA>5076  
3882>GGGCGATAGTATTAAGATTCTACAATGGACGATATTGATTTTGTAGTGGCGTGTATGATGTTAAAAATTACCAACAAATCTGTGGTAGATGAAATTTACAAA>3981  
3882>GGGCGATAGTATTAAGATTCTACAATGGACGATATTGATTTTGTAGTGGCGTGTATGATGTTAAAAATTACCAACAAATCTGTGGTAGATGAAATTTACAAA>3981

5401>CAAAGCACTAAAACCTTTGTCTAGAGAACATGAAGAAATCACCACAAGCCCCAAAGGTGGCAATTA>5466  
5077>CAAAGCACTAAAACCTTTGTCTAGAGAACATGAAGAAATCACCACAAGCCCCAAAGGTGGCAATTA>5142  
5077>CAAAGCACTAAAACCTTTGTCTAGAGAACATGAAGAAATCACCACAAGCCCCAAAGGTGGCAATTA>5142  
3982>CAAAGCACTAAAACCTTTGTCTAGAGAACATGAAGAAATCACCACAAGCCCCAAAGGTGGCAATTA>4047  
3982>CAAAGCACTAAAACCTTTGTCTAGAGAACATGAAGAAATCACCACAAGCCCCAAAGGTGGCAATTA>4047

**Figure S5.** *cagY* sequence alignments for parental *H. pylori* 7.13, DFMO-4, 7.13 [DFMO-4], DFMO-8 and 7.13 [DFMO-8].

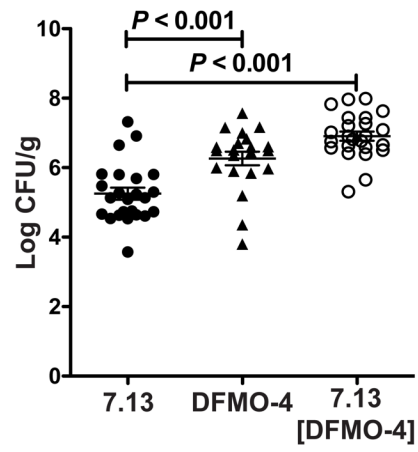

**Figure S6.** Colonization density in gastric tissues of gerbils infected with *H. pylori* 7.13, DFMO-4, or 7.13 [DFMO-4] for 12 weeks. ANOVA with Newman-Keuls multiple comparisons test was used.

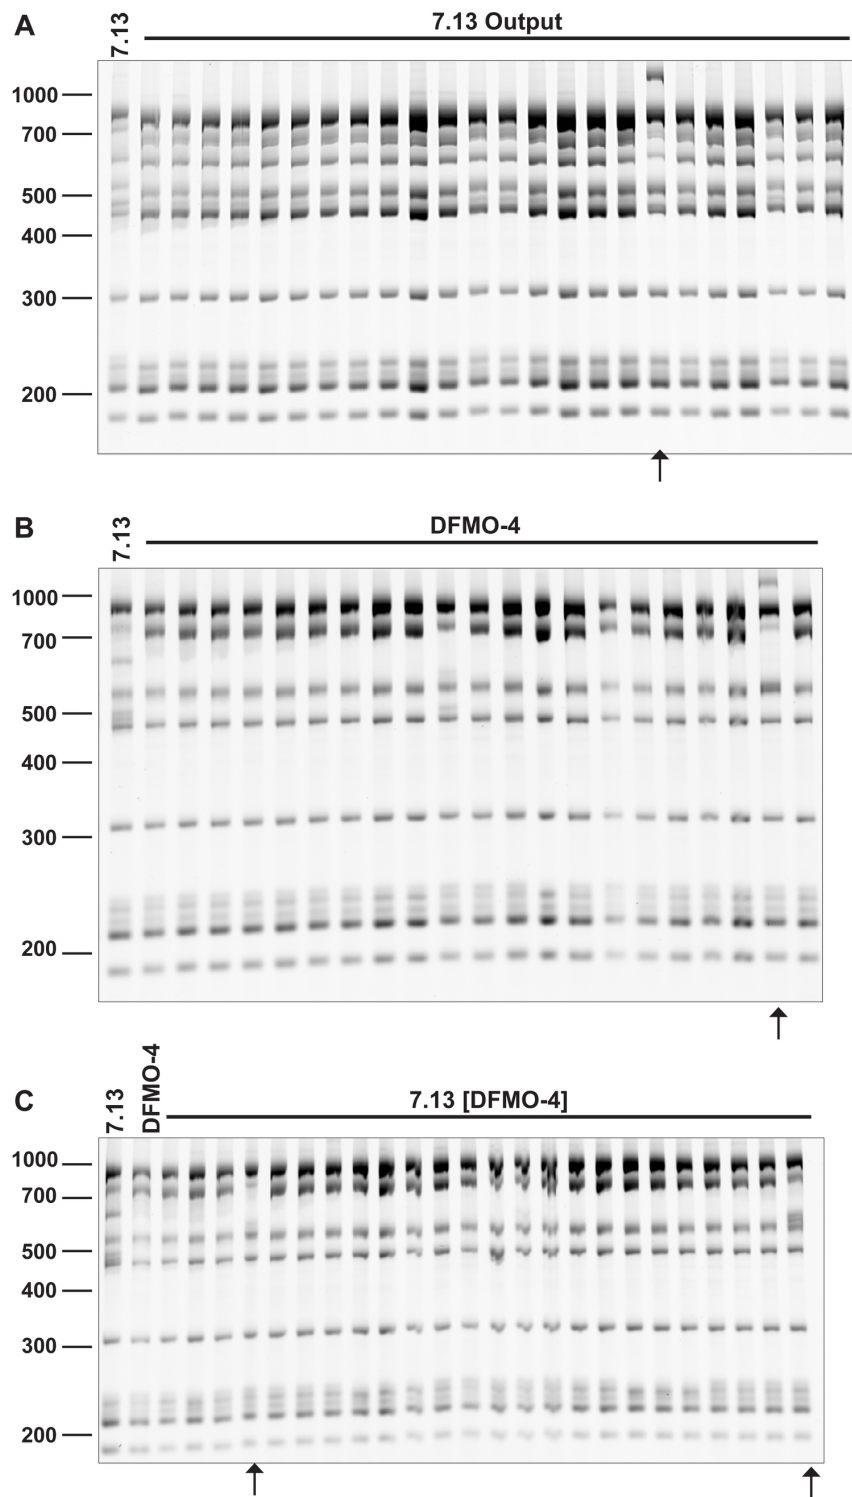

**Figure S7.** *cagY* RFLP profile of output strains from gerbils infected with (A) *H. pylori* 7.13, (B) DFMO-4 or (C) 7.13 [DFMO-4]. Arrows indicate strains with a different RFLP profile compared to the strain used for infection.

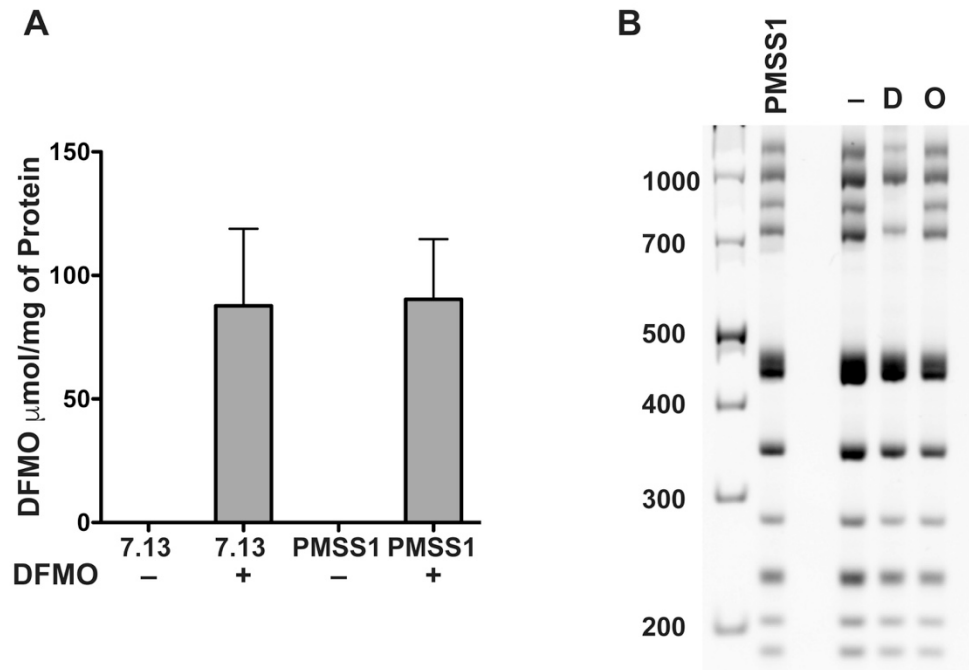

**Figure S8.** (A) Quantification of DFMO levels by mass spectrometry in *H. pylori* strains 7.13 and PMSS1 after 24 h of culture with DFMO. Error bars represent SEM. (B) *cagY* RFLP profile of *H. pylori* PMSS1 serially passaged on regular plates or plates supplemented with DFMO (D) or ornithine (O). RFLP profile is shown for passage 20.

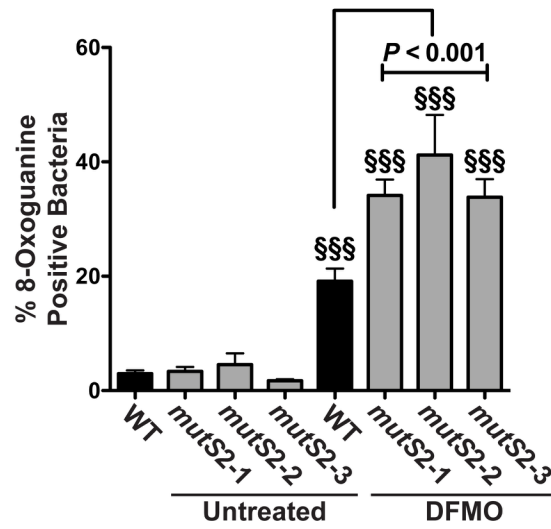

**Figure S9.** Oxidative DNA damage in 3 *H. pylori*  $\Delta$ *mutS2* clones. Percentage of 8-oxoguanine-positive bacteria assessed by flow cytometry in *H. pylori* WT and  $\Delta$ *mutS2* after DFMO treatment for 24 h. §§§ $P < 0.001$  versus untreated bacteria.

**Table S1. Frequency of rifampicin-resistant colonies in control and DFMO gerbil output strains.**

|                       | <b>Frequency of rifampicin resistance</b> | <b>SE</b>              |
|-----------------------|-------------------------------------------|------------------------|
| <b>Parental</b>       | $7.152 \times 10^{-8}$                    | $1.277 \times 10^{-8}$ |
| <b>Control Output</b> | $6.547 \times 10^{-8}$                    | $2.577 \times 10^{-8}$ |
| <b>DFMO Output</b>    | $1.154 \times 10^{-7}$                    | $4.915 \times 10^{-8}$ |

**Table S2. Frequency of rifampicin-resistant colonies in strains serially passaged on regular or DFMO-containing plates.**

|                         | <b>Frequency of rifampicin resistance</b> | <b>SE</b>              |
|-------------------------|-------------------------------------------|------------------------|
| <b>Control in vitro</b> | $1.282 \times 10^{-6}$                    | $2.693 \times 10^{-7}$ |
| <b>DFMO in vitro</b>    | $7.256 \times 10^{-7}$                    | $6.873 \times 10^{-7}$ |



**Table S3. List of primers**

| Species          | Target gene      | Sequence (5'-3')                                             |
|------------------|------------------|--------------------------------------------------------------|
| Human            | <i>CXCL8</i>     | F: TCTTGGCAGCCTTCCTGATT<br>R: TCTTTAGCACTCCTTGGCAAAAC        |
| Human            | <i>GAPDH</i>     | F: AGCCTCAAGATCATCAGCAATG<br>R: GGGTGCTAAGCAGTTGGTGG         |
| <i>H. pylori</i> | <i>sodB</i>      | F: GGGCATATCAATTGGCATTTTG<br>R: CCACTGAGCCTAAGCCTTCTTTT      |
| <i>H. pylori</i> | <i>katA</i>      | F: CAGTGCGGATGCGGTAAGA<br>R: TGTTCCCTACTAAATCCCAGTTACCT      |
| <i>H. pylori</i> | <i>mutS2</i>     | F: CCATCATTCCATTATCCCCTATTT<br>R: GCCGGCAAAAAGTAGAGATATTGTT  |
| <i>H. pylori</i> | <i>16S</i>       | F: TGCAAGTGGAGCCAATCTT<br>R: GGAACGTATTCACCGCAACA            |
| <i>H. pylori</i> | <i>fucT</i>      | F: AAAGGATAACCATGTTCCAACCCC<br>R: ACGCTCAAAAAGAAGCGTTAGCG    |
| <i>H. pylori</i> | <i>amiA</i>      | F: GTGGATAAGATTATCAGCGTG CAT<br>R: CATCTACAACCTAATCATTGCCTAA |
| <i>H. pylori</i> | <i>cagA</i> Seq1 | F: ATTTTTAGCAGTCTTTGACACC                                    |
| <i>H. pylori</i> | <i>cagA</i> Seq2 | F: TGGAAATGTTAGATGTTGAGGGAGTCGC                              |
| <i>H. pylori</i> | <i>cagA</i> Seq3 | F: TCTTCAAGGTAGCCTAAAACATGATGGC                              |
| <i>H. pylori</i> | <i>cagA</i> Seq4 | R: ACAGCAACAAGGAATTGGTTG                                     |
| <i>H. pylori</i> | <i>cagA</i> Seq5 | F: ACAGCAACAAGGAATTGGTTG                                     |
| <i>H. pylori</i> | <i>cagA</i> Seq6 | R: ATATGATACCATGAATTGGTAGC                                   |
